# Supplementary material for: A protocol for obtaining upper and lower extremity joints’ range of motion in children using three-dimensional motion analysis system
Source: Frontiers journal article supplement (doi:10.3389/fphys.2024.1416175), 2024-08-21

# Anthropometric Measurements and Range of Motion Assessment Form

Participant's Name \_\_\_\_\_ Age \_\_\_\_\_

Examiner Name \_\_\_\_\_ Date \_\_\_\_\_

## Anthropometric Measurements

| Segment               | Length |
|-----------------------|--------|
| Bideltoid breadth     |        |
| Biacromial breadth    |        |
| Shoulder-Elbow length |        |
| Elbow-Hand length     |        |
| Bi-trochanter breadth |        |
| Buttock-Knee length   |        |
| Knee height           |        |
| Functional leg length |        |

\*Segment length in cm

Additional notes:

---

---

---

---

---

---

---

## Range of Motion Assessment

| Joint    | Motion           | AROM | Pain Level | PROM | Pain Level | Comments |
|----------|------------------|------|------------|------|------------|----------|
| Shoulder | Flexion          |      |            |      |            |          |
|          | Extension        |      |            |      |            |          |
|          | Abduction        |      |            |      |            |          |
|          | Medial rotation  |      |            |      |            |          |
|          | Lateral rotation |      |            |      |            |          |
| Elbow    | Flexion          |      |            |      |            |          |
|          | Extension        |      |            |      |            |          |
|          | Pronation        |      |            |      |            |          |
|          | Supination       |      |            |      |            |          |
| Wrist    | Flexion          |      |            |      |            |          |
|          | Extension        |      |            |      |            |          |
|          | Radial deviation |      |            |      |            |          |
|          | Ulnar deviation  |      |            |      |            |          |
| Hip      | Flexion          |      |            |      |            |          |
|          | Extension        |      |            |      |            |          |
|          | Abduction        |      |            |      |            |          |
|          | Adduction        |      |            |      |            |          |
|          | Medial rotation  |      |            |      |            |          |
|          | Lateral rotation |      |            |      |            |          |
| Knee     | Flexion          |      |            |      |            |          |
|          | Extension        |      |            |      |            |          |
|          | Medial rotation  |      |            |      |            |          |
|          | Lateral rotation |      |            |      |            |          |
| Ankle    | Plantarflexion   |      |            |      |            |          |
|          | Dorsiflexion     |      |            |      |            |          |
|          | Inversion        |      |            |      |            |          |
|          | Eversion         |      |            |      |            |          |

\*AROM and PROM measurements in degrees

\*Pain level indicated by a pain scale from 0 – 10, where 0 indicates no pain and 10 indicates unbearable pain

## Pain Assessment Tool

### PAIN ASSESSMENT CHART

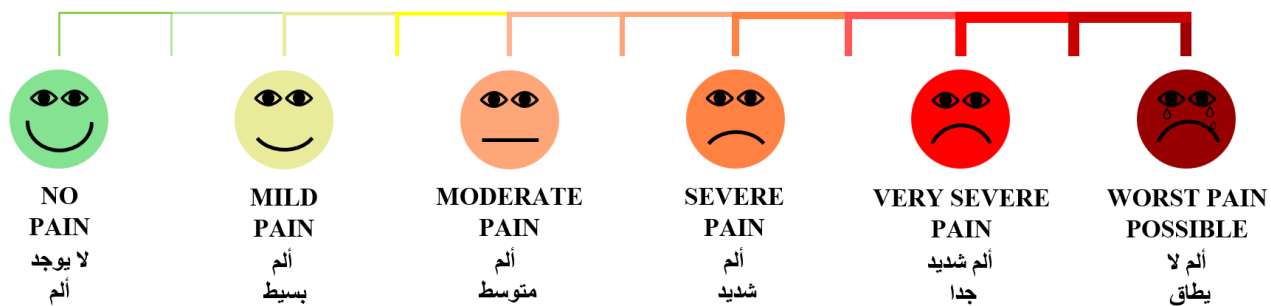

Supplement: Data_Sheet_1.pdf [file Data_Sheet_1.pdf]
